Corrigendum

## **Genetic and molecular identification of genes required for female gametophyte development and function in *Arabidopsis***

Gabriela C. Pagnussat, Hee-Ju Yu, Quy A. Ngo, Sarojam Rajani, Sevugan Mayalagu, Cameron S. Johnson, Arnaud Capron, Li-Fen Xie, De Ye and Venkatesan Sundaresan *Development* **132**, 603-614.

Some of the data in Tables S1 and S2 of this article were originally published incorrectly. The correct versions of the tables are now available at <http://dev.biologists.org/cgi/content/full/132/3/603/DC1> and replace the previous versions.

The authors apologise to readers for this mistake.
